# Supplementary material for: High birefringence bistolane liquid crystals: synthesis and properties
Source: Royal Society of Chemistry journal article supplement (doi:10.1039/c5ra15291g), 2015-12-11
Supplement: c5ra15291g1.pdf [file c5ra15291g1.pdf]

## Electronic Supplementary Information

# High birefringence bistolane liquid crystals: the synthesis and properties

Dorota Węglowska\*, Przemysław Kula and Jakub Herman

Faculty of Advanced Technologies and Chemistry, Military University of Technology,  
2 Kaliskiego Str., 00-908 Warsaw 49, Poland

\*Email: dorota.weglowska@wat.edu.pl

### 1 Preparative procedures

The purity of intermediates and the main compounds were determined by thin layer chromatography (TLC) and GC-MS(EI) (Agilent 6890N, Santa Clara, CA, USA) chromatography system. The structures of the final compounds were confirmed by  $^1\text{H}$  and  $^{13}\text{C}$  NMR spectroscopy (Bruker, Avance III HD, 500 Hz;  $\text{CDCl}_3$ , Billerica, MA, USA).

### Experimental

#### 4-iodo-2-methyl aniline

The suspension of 2-methylaniline (250g; 2.33mol),  $\text{NaHCO}_3$  (391.4g; 4.66mol) in dichloromethane (1L) and water (1.4L) was mixed in room temperature. Then iodine was added partial wise. The reaction mixture was stirred at room temperature 1h. Then the reaction mixture was poured into  $\text{Na}_2\text{S}_2\text{O}_5$  and then by water twice. Phases were separated. The crude product was crystallized from ethyl alcohol (0.5L)/water(1.5L).

Yield: 485g (89.2%); GC: 99.9%; MS: 233, 216, 204, 191, 176, 165.

#### 1,4-diiodo-2-methylbenzene

To the suspension of 4-iodo-2-methyl aniline (485g; 2.08mol) in water (0.62L) hydrochloric acid (0.52mL) was added dropwise. The reaction mixture was cooled on carbon dioxide-acetone bath to  $-5^\circ\text{C}$  and the solution of  $\text{NaNO}_2$  (154.6g; 2.24mol) in water (0.7L) was added dropwise. Then the reaction mixture was stirred 1h at  $5^\circ\text{C}$ . Next, the solution of  $\text{NaI}$  (369.7g; 2.47mol) in water (0.4L) was added dropwise. Then to the reaction mixture  $\text{CH}_2\text{Cl}_2$  (1L) was added and the reaction mixture was poured into  $\text{Na}_2\text{S}_2\text{O}_5$  and by water twice. Phases were

separated. The organic phase was dried over MgSO<sub>4</sub> and the solvent was evaporated. The crude product was distilled under vacuum.

Yield: 395g (55.2%); bp: 108-109 (0.8mmHg); GC: 99.5%; MS: 344, 317, 291, 254, 217, 192, 172.

### **2-methyl-1,4-bis[(4-propylphenyl)ethynyl]benzene 3Me3**

To the suspension of 1,4-diiodo-2-methylbenzene (17.2g; 0.05mol), triethylamine (13.84mL; 0.1mol), 1,8-diazabicyclo(5.4.0)undec-7-en (14.92mL; 0.1mol), PdCl<sub>2</sub>(PPh<sub>3</sub>)<sub>2</sub> cat. and CuI cat. in tetrahydrofurane (0.3L) the solution of 1-ethynyl-4-butylbenzen (18.63g; 0.1mol) in tetrahydrofurane (50mL) was added dropwise. The reaction mixture was stirred at room temperature 6h and then the solvent was evaporated. Then to the reaction mixture water (0.3L) and toluene (0.3L) were added and obtained emulsion was filtered off. Phases were separated. The inorganic phase was extracted with toluene (3×0.1L) and then the collected organic phases were poured into water (3×0.1L) and dried over MgSO<sub>4</sub>. The solvent was evaporated. The crude product was crystallized from ethanol (1L)/acetone (0.5L). A yellow solid was purified on a column chromatography (SiO<sub>2</sub>/hexane) and then recrystallized from ethanol (0.3L)/acetone (0.3L).

Yield: 15.3g (81.3%); GC: >99.9%; MS: 376, 360, 347, 331, 318, 302, 289, 276, 263, 250, 239, 226, 213, 202, 188, 173, 159.

<sup>1</sup>H NMR (CDCl<sub>3</sub>) δ 7.48-7.50 (*d*, 1H, Ar-H), 7.44 (*s*, 2H, Ar-H), 7.37 (*s*, 1H, Ar-H), 7.36 (*s*, 1H, Ar-H), 7.27 (*s*, 2H, A-H), 7.19-7.21 (*m*, 4H, Ar-H), 2.63-2.66 (*t*, 4H, Ar-CH<sub>2</sub>-), 2.55 (*s*, 3H, Ar-CH<sub>3</sub>), 1.66-1.73 (*m*, 4H, -CH<sub>2</sub>-), 0.97-1.00 (*t*, 6H, -CH<sub>3</sub>). <sup>13</sup>C NMR (CDCl<sub>3</sub>) δ 143.3, 140.1, 132.4, 131.7, 131.5, 128.8, 128.6, 123.2, 123.1, 120.6, 120.4, 95.3, 91.0, 88.8, 87.6, 38.0, 24.4, 24.3, 20.6, 13.8.

### **2-methyl-1,4-bis[(4-butylphenyl)ethynyl]benzene 4Me4**

Yield: 15.2g (75.0%); GC: 99.6%; MS: 404, 389, 361, 345, 318, 302, 276, 250, 226, 202, 181, 159.

### **2-methyl-1,4-bis[(4-pentylphenyl)ethynyl]benzene 5Me5**

Yield: 13.1g (60.7%); GC: >99.9%; MS: 432, 417, 402, 389, 375, 362, 345, 331, 318, 302, 289, 276, 263, 239, 216, 202, 189, 176, 159.

### **2-methyl-1,4-bis[(4-hexylphenyl)ethynyl]benzene 6Me6**

Yield: 16.8g (72.9%); GC: >99.9%; MS: 460, 438, 416, 389, 364, 345, 318, 289, 263, 245, 226, 202, 178, 159.

### **2-methyl-1,4-bis[(4-heptylphenyl)ethynyl]benzene 7Me7**

Yield: 16.9g (69.2%); GC: >99.9%; MS: 488, 458, 430, 403, 373, 345, 318, 289, 263, 226, 202, 159, 115, 91, 67, 43, 20.

**4-[(4-heptylphenyl)ethynyl]-2-methyl-1-[(4-butylphenyl)ethynyl]benzene 7Me4**

Yield: 3.8g (45%); GC: 98.7%; MS: 446, 418, 403, 376, 361, 345, 318, 302, 276, 252, 226, 202, 181, 159.

**4-[(4-heptylphenyl)ethynyl]-2-methyl-1-[(4-pentylphenyl)ethynyl]benzene 7Me5**

Yield: 3.5 (42%); GC: 97.7%; MS: 460, 444, 417, 403, 389, 375, 361, 346, 332, 318, 302, 276, 252, 226, 202, 187, 173, 159.

**1,4-bis[(4-pentyloxyphenyl)ethynyl]-2-methylbenzene 5OMeO5**

Yield: 4.2g (55%); GC: 99.4%; MS: 464, 435, 418, 393, 377, 350, 324, 294, 276, 252, 231, 202, 178, 162.

**1-[(4-pentylphenyl)ethynyl]-2-methyl-4-[[4-(ethylsulfanyl)phenyl]ethynyl]benzene 2SMe5**

Yield: 3.4g (65%); GC: 99.9%; MS: 422, 393, 365, 336, 182.

**2-methyl-1,4-bis[[4-(pentylsulfanyl)phenyl]ethynyl]benzene 5SMeS5**

Yield: 7.1 (47%); GC: 99.4%; MS: 496, 466, 443, 425, 393, 374, 355, 321, 289, 269, 248, 213, 178, 160.

**2-ethyl-1,4-bis[(4-ethylphenyl)ethynyl]benzene 2Et2**

Yield: 15g (55%); GC: 99.5%; MS: 362, 317, 289, 166.

<sup>1</sup>H NMR (CDCl<sub>3</sub>) δ 7.48-7.50 (*d*, 1H, Ar-H), 7.44 (*s*, 2H, Ar-H), 7.37 (*s*, 1H, Ar-H), 7.35 (*s*, 1H, Ar-H), 7.27 (*s*, 2H, A-H), 7.21-7.24 (*m*, 4H, Ar-H), 2.89-2.94 (*q*, 2H, Ar-CH<sub>2</sub>-), 2.68-2.73 (*q*, 4H, Ar-CH<sub>2</sub>-), 1.34-1.37 (*t*, 3H, -CH<sub>3</sub>), 1.27-1.30 (*t*, 6H, -CH<sub>3</sub>). <sup>13</sup>C NMR (CDCl<sub>3</sub>) δ 146.1, 144.8, 136.6, 132.0, 131.5, 131.0, 128.8, 128.0, 123.2, 122.5, 120.6, 120.4, 94.7, 90.9, 88.9, 87.3, 28.9, 27.7, 15.3, 14.6.

**2-ethyl-1,4-bis[(4-propylphenyl)ethynyl]benzene 3Et3**

Yield: 18g (65%); GC: 99.7%; MS: 392, 317, 166.

**4-[(4-propylphenyl)ethynyl]-2-ethyl-1-[(4-pentylphenyl)ethynyl]benzene 3Et5**

Yield: 5g (59%); GC: 99.5%; MS: 418, 389, 361, 317, 166.

**2-ethyl-1,4-bis[(4-butylphenyl)ethynyl]benzene 4Et4**

Yield: 11g (67%); GC: 99.8%; MS: 418, 375, 317, 166.

**4-[(4-butylphenyl)ethynyl]-2-ethyl-1-[(4-ethylphenyl)ethynyl]benzene 4Et2**

Yield: 12g (62%); GC: 99.3%; MS: 390, 347, 317, 166.

**4-[(4-butylphenyl)ethynyl]-2-ethyl-1-[(4-propylphenyl)ethynyl]benzene 4Et3**

Yield: 6.8g (54%); GC: 99.6%; MS: 404, 375, 331, 166.

**2-ethyl-1,4-bis[(4-pentylphenyl)ethynyl]benzene 5Et5**

Yield: 12g (55%); GC: 99.0%; MS: 446, 431, 389, 166.

**4-[(4-pentylphenyl)ethynyl]-2-ethyl-1-[(4-propylphenyl)ethynyl]benzene 5Et3**

Yield: 12g (62%); GC: 99.5%; MS: 418, 389, 361, 317, 166.

**2-ethyl-1,4-bis{[4-(pentylsulfanyl)phenyl]ethynyl}benzene 5SEtS5**

Yield: 5.6g (49%); GC: 99.5%; MS: 510, 439, 302, 255, 185.

**Table 1.** The melting temperatures [°C] (upper row; onset point) and the enthalpies [kJ/mol] (lower row) of the members of the homologous series **nXXXm** from DSC measurements determined during heating cycles.

| Acronym       | R                             | n | m | Cr | T <sub>mp</sub><br>[°C] | N | T <sub>c</sub><br>[°C] | Iso |
|---------------|-------------------------------|---|---|----|-------------------------|---|------------------------|-----|
| <b>3Me3</b>   | CH <sub>3</sub>               | 3 | 3 | •  | 125.3<br>19.16          | • | 208.3<br>1.08          | •   |
| <b>4Me4</b>   | CH <sub>3</sub>               | 4 | 4 | •  | 87.7<br>27.38           | • | 178.9<br>0.88          | •   |
| <b>5Me5</b>   | CH <sub>3</sub>               | 5 | 5 | •  | 80.5<br>20.60           | • | 176.1<br>1.44          | •   |
| <b>6Me6</b>   | CH <sub>3</sub>               | 6 | 6 | •  | 73.4<br>27.29           | • | 151.5<br>1.02          | •   |
| <b>7Me7</b>   | CH <sub>3</sub>               | 7 | 7 | •  | 72.7<br>26.94           | • | 147.4<br>1.27          | •   |
| <b>7Me4</b>   | CH <sub>3</sub>               | 7 | 4 | •  | 45.5<br>11.99           | • | 158.9<br>1.22          | •   |
| <b>7Me5</b>   | CH <sub>3</sub>               | 7 | 5 | •  | 53.3<br>15.90           | • | 160.7<br>1.56          | •   |
| <b>5OMeO5</b> | CH <sub>3</sub>               | 5 | 5 | •  | 120.8<br>36.97          | • | 217.9<br>0.22          | •   |
| <b>2SMe5</b>  | CH <sub>3</sub>               | 2 | 5 | •  | 110.9<br>27.04          | • | 186.3<br>1.20          | •   |
| <b>5SMeS5</b> | CH <sub>3</sub>               | 5 | 5 | •  | 120.0<br>50.32          | • | 126.4<br>0.67          | •   |
| <b>5SMe5</b>  | CH <sub>3</sub>               | 5 | 5 | •  | 94.1<br>34.57           | • | 150.2<br>0.96          | •   |
| <b>2Et2</b>   | C <sub>2</sub> H <sub>5</sub> | 2 | 2 | •  | 84.6<br>20.70           | • | 131.7<br>0.96          | •   |
| <b>3Et3</b>   | C <sub>2</sub> H <sub>5</sub> | 3 | 3 | •  | 48.2<br>14.48           | • | 151.9<br>1.65          | •   |
| <b>3Et5</b>   | C <sub>2</sub> H <sub>5</sub> | 3 | 5 | •  | 59.4<br>16.37           | • | 137.4<br>1.59          | •   |
| <b>4Et4</b>   | C <sub>2</sub> H <sub>5</sub> | 4 | 4 | •  | 29.5<br>16.70           | • | 121.0<br>1.37          | •   |
| <b>4Et2</b>   | C <sub>2</sub> H <sub>5</sub> | 4 | 2 | •  | 58.7<br>26.03           | • | 123.5<br>1.08          | •   |
| <b>4Et3</b>   | C <sub>2</sub> H <sub>5</sub> | 4 | 3 | •  | 36.4<br>22.27           | • | 131.8<br>1.45          | •   |
| <b>5Et5</b>   | C <sub>2</sub> H <sub>5</sub> | 5 | 5 | •  | 3.9<br>5.88             | • | 120.7<br>1.58          | •   |
| <b>5Et3</b>   | C <sub>2</sub> H <sub>5</sub> | 5 | 3 | •  | 26.8<br>9.11            | • | 136.1<br>1.87          | •   |
| <b>5SEtS5</b> | C <sub>2</sub> H <sub>5</sub> | 5 | 5 | •  | 86.5<br>48.58           | - | -                      | •   |
